# Supplementary material
Source: MDPI journal article supplement (https://www.mdpi.com/2075-163X/9/9/558)
Supplement: s1 [file s1]

Archive with 2 entries (2 files):
- minerals-590900-supplementary/Supplementary Materials Figure S1.pdf
- minerals-590900-supplementary/Supplementary Materials Tables S1-S10.xlsx
