# Supplementary material
Source: MDPI journal article supplement (https://www.mdpi.com/2075-163X/9/9/558)
Supplement: s1 [file s1 › minerals-590900-supplementary/Supplementary Materials Tables S1-S10.xlsx]

## Sheet: Table S1 900 oC
Bulk (K2#/Ca#)											Phase	K2CO3	CaCO3	MgCO3	Ca#
Phases	n	K2CO3	σ	CaCO3	σ	MgCO3	σ	Ca#	σ
											K2	98.0565	1.94353	0	100
Bulk (64/92)		64		33.12		2.88		92				98.0605	1.9395	0	100
Measured	2	62.5859		34.6532		2.6		92.9				99.3288	0.671223	0	100
K2	4	98.0565		1.94353		0		100				99.3	0.722298	0.28593	100
K2Ca	12	49.5713	0.416434	48.4369	0.887503	1.99184	1.00556	96.0571	1.97844
											K2Ca	49.5713	48.4369	1.99184	96.0571
Bulk (59/60)		59		24.6		16.4		60				48.0866	35.952	15.9614	69.2584
Measured	1	57.5476		24.3199		18.1325		57.2874				49.2808	39.8622	10.857	78.6151
K2	2	98.0605		1.9395		0		100				49.2808	31.3797	19.2975	61.9207
K2Ca	10	48.0866	0.804042	35.952	0.949497	15.9614	0.9597	69.2584	1.70747			48.2762	30.0579	21.6658	58.1095
K2Mg	4	49.4436		7.41452		43.1419		14.6658				48.7297	41.0864	10.1839	80.15
												48.6802	43.9964	6.98792	86.3035
Bulk (53/40)		53		18.8		28.2		40
Measured	1	52.5307		19.2285		28.2408		40.5073			K2Ca3	26.0152	72.2409	1.74383	97.6399
K2	7	99.3288	0.1	0.671223	0.1	0	0	100	0			24.9862	73.7469	1.26694	98.3117
K2Ca	13	49.2808	0.6	39.8622	3.3	10.857	3.4	78.6151	6.6			23.2823	74.3029	2.41479	96.8565
K2Mg	10	51.3108	0.7	6.00592	2.2	42.6833	2.4	12.3352	4.3			24.8505	72.8976	2.25189	97.0031
Mgs	2	0.2		0.2		99.6		0.2				24.8731	72.8771	2.24975	97.0002
Bulk (53/25)		53		11.75		35.25		25			K2Mg	49.4436	7.41452	43.1419	14.6658
Measured	1	49.3486		11.2412		39.4102		22.1932				51.3108	6.00592	42.6833	12.3352
K2	4	99.3		0.722298		0.28593		100				51.3108	6.21014	42.3553	12.8
K2Ca	1	49.2808		31.3797		19.2975		61.9207				50.0604	5.06965	44.87	10.1516
K2Mg	13	51.3108	0.5	6.21014	1.7	42.3553	1.9	12.8	3.4			49.3797	3.08965	47.5306	6.10358
Mgs	3	0.2		0.443579		99.3314		0.444579				51.409	7.21513	41.3759	14.8
												49.8735	4.17393	45.9525	8.3
Bulk (50/25)		50		12.5		37.5		25				49.0196	8.64455	42.3358	17
Measured	1	47.5364		12.5425		39.9211		23.9071				48.9194	5.16975	45.9108	10.1
K2Ca	2	48.2762		30.0579		21.6658		58.1095				49.2672	4.07083	46.6619	8
K2Mg	4	50.0604		5.06965		44.87		10.1516				49.4348	5.58841	44.9768	11.1
Mgs	2	0.10975		0.507942		99.3823		0.508398				49.0127	5.42933	45.558	10.6484
												48.029	4.26769	47.7033	8.2
Bulk (43/70)		43		39.9		17.1		70				49.7633	5.42951	44.8072	10.8
Measured	1	43.8018		41.6141		14.5841		74.0487				50.2502	4.44148	45.3083	8.9
K2Ca	8	48.7297	0.406576	41.0864	1.43966	10.1839	1.66053	80.15	3.15074
K2Ca3	4	26.0152		72.2409		1.74383		97.6399				1.7675	98.2325	0	100
K2Mg	8	49.3797	0.8	3.08965	1.1	47.5306	1.5	6.10358	2.2		Arg	1.21232	98.7877	0	100
												0.936901	99.0631	0	100
Bulk (40/25)		40		15		45		25				1.24366	98.7563	0	100
Measured	1	38.4312		15.6623		45.9065		25.4387				0.760988	99.239	0	100
K2Mg	6	51.409	0.4	7.21513	0.8	41.3759	1	14.8	1.6			0.898444	99.1016	0	100
Arg	2	1.7675		98.2325		0		100				1.32756	98.6724	0	100
Mgs	3	0.0542431		0.43246		99.5133		0.432712				0.42715	99.5729	0	100
												0.42715	99.5729	0	100
Bulk (37/90)		37		56.7		6.3		90				1.02375	98.9762	0	100
Measured	1	35.8045		58.4214		5.77412		91.0054
K2Ca	21	48.6802	0.400468	43.9964	4.09503	6.98792	4.1437	86.3035	8.08175			0.2	0.2	99.6	0.2
K2Ca3	19	24.9862	0.653397	73.7469	0.656468	1.26694	0.313312	98.3117	0.415845		Mgs	0.2	0.443579	99.3314	0.444579
K2Mg	7	49.8735	0.2	4.17393	1.5	45.9525	1.9	8.3	2.7			0.10975	0.507942	99.3823	0.508398
												0.0542431	0.43246	99.5133	0.432712
Bulk (36/60)		36		38.4		25.6		60				0.238232	0	99.554	0
Measured	1	34.5114		40.0486		25.44		61.1536				0	0.406662	99.4701	0.407036
K2Ca3	6	23.2823	1.24244	74.3029	0.977392	2.41479	0.304092	96.8565	0.349647			0	0	100	0
K2Mg	3	49.0196		8.64455		42.3358		17				0.187875	0.651524	99.1606	0.652757
Arg	9	1.21232	0.15299	98.7877	0.15299	0	0	100	0			0.0824206	0	99.9176	0
												0.083859	0.507365	99.4088	0.507678
Bulk (29/40)		29		28.4		42.6		40
Measured	1	28.3025		27.6802		44.0173		38.6069
K2Mg	8	48.9194	1.1	5.16975	0.8	45.9108	1.4	10.1	1.5
Arg	2	0.936901		99.0631		0		100
Mgs	2	0.238232		0		99.554		0
Bulk (25/25)		25		18.75		56.25		25
Measured	2	25		18.75		56.25		25
K2Mg	1	49.2672		4.07083		46.6619		8
Arg	4	1.24366		98.7563		0		100
Mgs	3	0		0.406662		99.4701		0.407036
Bulk (18/92)		18		75.44		6.56		92
Measured	1	19.3654		73.4777		7.15682		91.1244
K2Ca3	14	24.8505	0.356712	72.8976	0.439231	2.25189	0.187189	97.0031	0.252509
K2Mg	2	49.4348		5.58841		44.9768		11.1
Arg	20	0.760988	0.200988	99.239	0.200988	0	0	100	0
Mgs	1	0		0		100		0	0
Bulk (16/70)		16		58.8		25.2		70
Measured	1	16.2157		56.3398		27.4445		67.2439
K2Mg	6	49.0127	0.8	5.42933	0.6	45.558	1.3	10.6484	1.2
Arg	8	0.898444	0.20453	99.1016	0.20453	0	0	100	0
Mgs	3	0.187875		0.651524		99.1606		0.652757
Bulk (10/25)		10		22.5		67.5		25
Measured	1	10.6214		22.8165		66.5621		25.5279
K2Mg	7	48.029	0.8	4.26769	0.4	47.7033	0.7	8.2	0.6
Arg	2	1.32756		98.6724		0		100
Mgs	1	0.0824206		0		99.9176		0
Bulk (8/93)		8		85.56		6.44		93
Measured	2	0.0824206		83.8886		8.06887		91.2255
K2Ca3	3	24.8731		72.8771		2.24975		97.0002
K2Mg	1	49.7633		5.42951		44.8072		10.8
Arg	6	0.42715	0.0617914	99.5729	0.0617914	0	0	100	0
Bulk (8/40)		8		36.8		55.2		40
Measured	1	9.5477		38.7684		51.6839		42.8606
K2Mg	4	50.2502		4.44148		45.3083		8.9
Arg	4	1.02375		98.9762		0		100
Mgs	6	0.083859	0.105714	0.507365	0.24863	99.4088	0.21591	0.507678	0.248742

## Sheet: Table S2 1000 oC
Bulk (K2#/Ca#)											Phase	K2CO3	CaCO3	MgCO3	Ca#
Phases	n	K2CO3	σ	CaCO3	σ	MgCO3	σ	Ca#	σ
											K2	99.0345	0.965483	0	100
Bulk (59/60)		59		24.6		16.4		60
Measured	2	55.6538		27.4243		16.9218		61.8412			K2Ca	50.0805	37.6856	12.2339	75.4701
K2	6	99.0345	0.177173	0.965483	0.177173	0	0	100	0			50.1316	36.6141	13.2543	73.4231
K2Ca	15	50.0805	0.454686	37.6856	2.3574	12.2339	2.07335	75.4701	4.34031			49.2133	25.8701	24.9166	50.9405
K2Mg	12	51.8329	0.5	5.89429	2.7	42.2728	2.9	12.2372	5.2			49.446	36.3769	14.1771	71.9629
												49.2875	38.3923	12.3202	75.7387
Bulk (53/40)		53		18.8		28.2		40
Measured	1	52.9261		19.6964		27.3776		41.8413			K2Ca3	25.7369	71.9856	2.27756	96.9304
K2	+	+		+		+						25.4574	72.524	2.01858	97.2927
K2Ca	6	50.1316	0.465463	36.6141	1.88907	13.2543	1.8909	73.4231				25.1439	69.3488	5.50735	92.6429
K2Mg	2	51.5674		3.98963		44.443		8.23748				25.1552	69.7256	5.11918	93.1601
												24.5717	70.0332	5.39509	92.8478
Bulk (53/25)		53		11.75		35.25		25			K2Mg	51.8329	5.89429	42.2728	12.2372
Measured	1	51.7186		8.33703		39.9444		17.2676				51.5674	3.98963	44.443	8.23748
K2	+	+		+		+						52.0201	7.65505	40.3248	16
K2Ca	5	49.2133	0.345287	25.8701	0.318378	24.9166	0.461605	50.9405	0.706547			51.7591	11.8498	36.3911	24.5638
K2Mg	20	52.0201	0.6	7.65505	2.6	40.3248	2.9	16	5.2			51.7952	4.49876	43.7061	9.33259
Mgs	3	0.329478		0.328817		99.3417		0.329906				51.441	5.43038	43.1286	11.1831
												51.1308	8.04998	40.8192	16.5
Bulk (50/25)		50		12.5		37.5		25				51.6698	6.89696	41.4332	14.2705
Measured	2	50		12.5		37.5		25				51.233	5.53783	43.2292	11.3557
K2Mg	31	51.7591	0.5	11.8498	4.8	36.3911	5	24.5638	9.4			51.38	6.41594	42.2041	13.2
												49.4203	8.99321	41.5865	17.7803
Bulk (43/70)		43		39.9		17.1		70				50.0464	7.52642	42.4272	15.0668
Measured	1	41.8457		41.8816		16.2727		72.0181				49.2593	7.14196	43.5988	14.1
K2Ca	7	49.446	0.204761	36.3769	2.35816	14.1771	2.43302	71.9629	4.76546			50.4526	6.71647	42.8309	13.5557
K2Ca3	11	25.7369	0.677096	71.9856	0.91222	2.27756	0.28764	96.9304	0.415251
K2Mg	6	51.7952	0.1	4.49876	0.2	43.7061	0.1	9.33259	0.4		Arg	1.07266	98.9273	0	100
Mgs	+	+		+		+						1.29476	98.7052	0	100
												0.947634	98.832	0.220329	99.7776
Bulk (40/25)		40		15		45		25				1.16086	98.8391	0	100
Measured		39.8584		15.5531		44.5886		25.8607				0.486932	99.5131	0	100
K2Mg	8	51.441	0.2	5.43038	0.6	43.1286	0.7	11.1831	1.2			0.80758	98.8623	0.330091	99.6668
Arg	+	+		+		+
Mgs	1	0.266654		0.4959		99.2374		0.497226			Mgs	0.329478	0.328817	99.3417	0.329906
												0.266654	0.4959	99.2374	0.497226
Bulk (37/90)		37		56.7		6.3		90				0.135955	0.554611	99.3094	0.555366
Measured	1	35.3174		59.4773		5.20525		91.9526				0.124331	0.567663	99.308	0.568377
K2Ca	2	49.2875		38.3923		12.3202		75.7387				0.083725	0.509025	99.4072	0.509456
K2Ca3	6	25.4574	0.178104	72.524	0.224633	2.01858	0.322041	97.2927	0.427258			0.112474	0.677566	99.21	0.678321
K2Mg	2	51.1308		8.04998		40.8192		16.5				0.196616	1.09242	98.711	1.09481
Bulk (36/60)		36		38.4		25.6		60
Measured	1	35.3096		39.514		25.1764		61.0817
K2Ca3	4	25.1439		69.3488		5.50735		92.6429
K2Mg	7	51.6698	0.5	6.89696	0.7	41.4332	0.7	14.2705	1.3
Bulk (29/40)		29		28.4		42.6		40
Measured	1	27.6243		27.0627		45.313		37.392
K2Mg	4	51.233		5.53783		43.2292		11.3557
Arg	2	1.07266		98.9273		0		100
Mgs	1	0.135955		0.554611		99.3094		0.555366
Bulk (18/92)		18		75.44		6.56		92
Measured	1	17.9182		74.8095		7.27233		91.1401
K2Ca3	2	25.1552		69.7256		5.11918		93.1601
K2Mg	5	51.38	0.3	6.41594	1.1	42.2041	1	13.2	2
Arg	4	1.29476		98.7052		0		100
Bulk (16/70)		16		58.8		25.2		70
Measured	1	15.0959		59.3721		25.532		69.9284
K2Mg	3	49.4203		8.99321		41.5865		17.7803
Arg	2	0.947634		98.832		0.220329		99.7776
Mgs	3	0.124331		0.567663		99.308		0.568377
Bulk (10/25)		10		22.5		67.5		25
Measured	1	9.9358		23.6491		66.4151		26.258
K2Mg	4	50.0464		7.52642		42.4272		15.0668
Arg	2	1.16086		98.8391		0		100
Mgs	3	0.083725		0.509025		99.4072		0.509456
Bulk (8/93)		8		85.56		6.44		93
Measured	1	7.9266		84.6621		7.41127		91.9507
K2Ca3	9	24.5717	0.737613	70.0332	0.737613	5.39509	0.345983	92.8478	0.447784
K2Mg	7	49.2593	1	7.14196	1.7	43.5988	1.4	14.1	2.9
Arg	5	0.486932	0.0954236	99.5131	0.0954236	0	0	100	0
Mgs	4	0.112474		0.677566		99.21		0.678321
Bulk (8/40)		8		36.8		55.2		40
Measured	1	7.88246		39.9515		52.1661		43.3701
K2Mg	6	50.4526	1.5	6.71647	2.8	42.8309	1.5	13.5557	4.8
Arg	3	0.80758		98.8623		0.330091		99.6668
Mgs	2	0.196616		1.09242		98.711		1.09481

## Sheet: Table S3 1100 oC
Bulk (K2#/Ca#)											Phase	K2CO3	CaCO3	MgCO3	Ca#
Phases	n	K2CO3	σ	CaCO3	σ	MgCO3	σ	Ca#	σ
											K2	98.9814	1.01857	0	100
Bulk (64/25)		64		9		27		25
Measured	1	70.5752		7.22925		22.1955		24.5686			K8Ca3	58.2699	40.6277	1.10243	97.3585
K2	6	98.9814	0.225753	1.01857	0.225753	0	0	100	0			57.6284	41.2089	1.16265	97.2584
K2Mg	7	50.8963	0.13	6.50118	0.1	42.6025	0.25	13.2397	0.28
L	7	64.6756	0.51962	15.8337	0.343684	19.4907	0.620078	44.832	1.16774		K2Ca3	25.6426	72.0764	2.28093	96.9323
												25.2879	66.5563	8.15575	89.0837
Bulk (59/96)		59		39.36		1.64		96				25.3556	68.2378	6.40658	91.4164
Measured	n.d.											24.8641	63.92	11.2159	85.0725
K8Ca3	4	58.2699		40.6277		1.10243		97.3585				25.0539	67.5696	7.3765	90.1575
L	4	53.3134		39.8906		6.79604		85.4647				24.7071	63.575	11.7179	84.4374
												24.6964	64.8793	10.4243	86.1594
Bulk (49/90)		49		45.9		5.1		90				24.2841	68.1962	7.51973	90.0695
Measured	n.d.											24.6862	64.7451	10.5687	85.969
K8Ca3	3	57.6284		41.2089		1.16265		97.2584
K2Ca3	3	25.6426		72.0764		2.28093		96.9323			K2Mg	50.8963	6.50118	42.6025	13.2397
L	3	50.9266		41.8033		7.27012		85.1898				50.5027	8.51001	40.9873	17.1929
												50.0937	5.26098	44.6454	10.5
Bulk (45/35)		45		19.25		35.75		35				49.9645	5.46334	44.5722	10.9189
Measured	1	44.6077		19.2934		36.0989		34.8305
K2Ca3	9	25.2879	0.153466	66.5563	0.351548	8.15575	0.303591	89.0837	0.408997		Arg	0.863381	99.1366	0	100
K2Mg	5	50.5027	0.37	8.51001	0.41	40.9873	0.62	17.1929	0.84			0.867796	99.1322	0	100
L	3	38.5789		37.1837		24.2373		60.5393
											Ca-Dol	1.50947	62.8178	35.6727	63.7799
Bulk (27/90)		27		65.7		7.3		90				0.37172	65.9096	33.7187	66.1554
Measured	1	25.5597		67.9281		6.51223		91.2517
K2Ca3	4	25.3556		68.2378		6.40658		91.4164			Dol	0.252576	51	48.7474	51.1291
L	2	39.5822		41.8892		18.5287		69.3318				0.291444	49.9092	49.7994	50.0549
Bulk (25/25)		25		18.75		56.25		25			Mgs	0.117862	6.24819	93.6339	6.25564
Measured	1	25.0187		19.9367		55.0446		26.5889				0.270581	6.68177	93.0476	6.70139
K2Ca3	7	24.8641	0.16823	63.92	0.340315	11.2159	0.306915	85.0725	0.40693			0	0.564377	99.4356	0.564377
K2Mg	16	50.0937	0.55	5.26098	0.66	44.6454	0.33	10.5	1.15			0.06	0.65	99.28	0.65
Mgs	7	0.117862	0.0781808	6.24819	0.686347	93.6339	0.702259	6.25564	0.687945
L	4	31.6427		38.1483		30.209		55.8056			L	64.6756	15.8337	19.4907	44.832
												53.3134	39.8906	6.79604	85.4647
Bulk (18/92)		18		75.44		6.56		92				50.9266	41.8033	7.27012	85.1898
Measured	1	17.9194		75.8317		6.24894		92.3868				38.5789	37.1837	24.2373	60.5393
K2Ca3	3	25.0539		67.5696		7.3765		90.1575				39.5822	41.8892	18.5287	69.3318
Arg	3	0.863381		99.1366		0		100				31.6427	38.1483	30.209	55.8056
Ca-Dol	2	1.50947		62.8178		35.6727		63.7799				32.1994	39.527	28.2736	58.2989
Bulk (16/35)		16		29.4		54.6		35
Measured		16.3725		28.2176		55.41		33.742
K2Ca3	16	24.7071	0.279356	63.575	0.345966	11.7179	0.351712	84.4374	0.445795
K2Mg	9	49.9645	0.22	5.46334	0.24	44.5722	0.21	10.9189	0.43
Mgs	7	0.270581	0.276833	6.68177	0.90688	93.0476	1.11022	6.70139	0.92297
L	1	32.1994		39.527		28.2736		58.2989
Bulk (12/62)		12		54.56		33.44		62
Measured	1	11.941		54.8614		33.1976		62.3007
K2Ca3	10	24.6964	0.47323	64.8793	0.319299	10.4243	0.500071	86.1594	0.595754
Dol	5	0.252576	0.0952216	51	0.351088	48.7474	0.326757	51.1291	0.336358
Mgs	1	0		0.564377		99.4356		0.564377
Bulk (8/75)		8		69		23		75
Measured	1	8.12945		68.1674		23.7031		74.1994
K2Ca3	4	24.2841		68.1962		7.51973		90.0695
Arg	3	0.867796		99.1322		0		100
Ca-Dol	3	0.37172		65.9096		33.7187		66.1554
Bulk (8/40)		8		36.8		55.2		40
Measured	1	8.17067		36.2031		55.6262		39.4244
K2Ca3	13	24.6862	0.418138	64.7451	0.627922	10.5687	0.937652	85.969	0.680145
Dol	10	0.291444	0.0935169	49.9092	0.456131	49.7994	0.424996	50.0549	0.439478
Mgs	7	0.06	0.05	0.65	0.12	99.28	0.13	0.65	0.12

## Sheet: Table S4 1100 oC
Bulk (K2#/Ca#)											Phase	K2CO3	CaCO3	MgCO3	Ca#
Phases	n	K2CO3	σ	CaCO3	σ	MgCO3	σ	Ca#	σ
											K2	99.1899	0.810078	0	100
Bulk (90/55)		90		5.5		4.5		55				99.1663	0.833687	0	100
Measured	1	92.3375		5.00069		2.66183		65.2617				99.0508	0.949231	0	100
K2	11	99.1899	0.179133	0.810078	0.179133	0	0	100	0			98.3939	1.60613	0	100
L	9	64.6459	2.95449	21.7574	1.8643	13.5967	1.15612	61.541	0.908036
											K8Ca3	59.2421	39.8865	0.871439	97.8619
Bulk (80/50)		80		10		10		50				55.1708	43.561	1.26823	97.1745
Measured	2	83.5409		9.02137		7.43777		54.8582
K2	22	99.1663	0.201869	0.833687	0.201869	0	0	100	0		K2Ca3	25.7532	70.4225	3.82438	94.8491
K2Mg	30	50.0969	0.494195	15.0025	3.20253	34.9006	3.35682	30.081	6.56147			26.3258	71.5378	2.13639	97.1011
L	4	66.0133		21.9967		11.9901		64.7227				25.5062	68.9226	5.57118	92.5214
												25.2186	66.4832	8.29813	88.905
Bulk (70/50)		70		15		15		50				25.0425	61.9221	13.0354	82.71
Measured	1	73.3752		13.9875		12.6374		52.5354				25.4793	66.9878	7.53297	89.8924
K2	12	99.0508	0.235628	0.949231	0.235628	0	0	100	0			24.9627	67.5924	7.44493	90.0787
K2Mg	19	50.6552	1.11703	16.406	0.678582	32.9387	0.971646	33.2488	1.18843			25.1798	65.7388	9.08145	87.8628
L	2	63.6924		24.0512		12.2563		66.2446
											K2Mg	50.0969	15.0025	34.9006	30.081
Bulk (64/92)		64		33.12		2.88		92				50.6552	16.406	32.9387	33.2488
Measured	1	61.8039		35.561		2.63509		93.1012				50.8282	20.5834	28.5884	41.8633
K2	1	98.3939		1.60613		0		100				49.7643	8.8584	41.3773	17.6338
K8Ca3	6	59.2421	0.662702	39.8865	0.652794	0.871439	0.0728715	97.8619	0.174737			49.7488	4.62442	45.6268	9.2025
L	3	63.2992		30.9557		5.74516		84.3465				49.5997	4.10746	46.2928	8.14909
Bulk (59/60)		59		24.6		16.4		60			Arg	0.638263	99.3617	0	100
Measured	1	55.7209		26.3198		17.9594		59.4405				0.852735	99.0658	0.0814868	99.9175
K2Mg	19	50.8282	0.469158	20.5834	0.487691	28.5884	0.658511	41.8633	1.0457
L	9	60.524	1.14435	27.3031	0.887517	12.173	0.459077	69.1616	0.845587		Ca-Dol	0.54074	55.7258	43.5797	56.1135
												0.75044	60.5606	38.6889	61.0187
Bulk (50/25)		50		12.5		37.5		25
Measured	1	50.8516		13.2455		35.9029		26.95			Dol	0.955959	53.6588	45.3852	54.1786
K2Mg	14	49.7643	0.160432	8.8584	0.38364	41.3773	0.412898	17.6338	0.764807			0.46637	53.6628	45.8708	53.9131
L	3	54.7138		28.1536		17.1326		62.1659				0.691744	51.2334	48.0749	51.59
Bulk (44/78)		44		43.68		12.32		78			Mgs	0.142059	0.901791	98.9561	0.902779
Measured	1	43.7306		43.8482		12.4212		77.9255				0.131061	0.923435	98.9455	0.924769
K2Ca3	8	25.7532	0.12153	70.4225	0.209345	3.82438	0.156303	94.8491	0.211816			0.0504983	0.428573	99.5209	0.428832
L	9	45.3039	0.460719	41.2502	0.599469	13.4459	0.326069	75.4149	0.65595			0	0.668841	99.3133	0.669011
Bulk (42/92)		42		53.36		4.64		92			L	64.6459	21.7574	13.5967	61.541
Measured	1	42.4313		52.9191		4.64964		91.9233				66.0133	21.9967	11.9901	64.7227
K8Ca3	5	55.1708	0.710578	43.561	0.576882	1.26823	0.175072	97.1745	0.356478			63.6924	24.0512	12.2563	66.2446
K2Ca3	14	26.3258	0.535361	71.5378	0.449028	2.13639	0.170821	97.1011	0.219151			63.2992	30.9557	5.74516	84.3465
L	5	48.5755	0.350572	43.1009	0.285129	8.3236	0.243885	83.8148	0.418054			60.524	27.3031	12.173	69.1616
												54.7138	28.1536	17.1326	62.1659
Bulk (40/25)		40		15		45		25				45.3039	41.2502	13.4459	75.4149
Measured	1	39.4999		15.1519		45.3483		25.0443				48.5755	43.1009	8.3236	83.8148
K2Mg	11	49.7488	0.270075	4.62442	0.287902	45.6268	0.368509	9.2025	0.568021			34.3893	39.4706	26.1401	60.16
Mgs	6	0.142059	0.0576657	0.901791	0.782635	98.9561	0.738304	0.902779	0.783099			37.7216	34.5477	27.7307	55.4727
L	2	34.3893		39.4706		26.1401		60.16				35.3694	44.8243	19.8063	69.3547
Bulk (30/15)		30		10.5		59.5		15
Measured	1	30.4912		9.47909		60.0297		13.6372
K2Mg	11	49.5997	0.257132	4.10746	0.167895	46.2928	0.225011	8.14909	0.313919
Mgs	12	0.131061	0.0726553	0.923435	1.22316	98.9455	1.23609	0.924769	1.22516
L	2	37.7216		34.5477		27.7307		55.4727
Bulk (27/90)		27		65.7		7.3		90
Measured	1	25.9947		67.9814		6.02393		91.8601
K2Ca3	12	25.5062	0.0782258	68.9226	0.0945577	5.57118	0.123	92.5214	0.160242
L	1	35.3694		44.8243		19.8063		69.3547
Bulk (16/70)		16		58.8		25.2		70
Measured	1	14.4001		59.3527		26.2472		69.3373
K2Ca3	8	25.2186	0.405919	66.4832	0.181754	8.29813	0.322644	88.905	0.375962
Dol	7	0.955959	0.337169	53.6588	0.829392	45.3852	1.05612	54.1786	0.953203
Bulk (10/25)		10		22.5		67.5		25
Measured	1	9.95247		23.1905		66.857		25.7536
K2Ca3	11	25.0425	0.742818	61.9221	8.85951	13.0354	9.52567	82.71	12.3874
Dol	7	0.46637	0.139489	53.6628	1.07987	45.8708	0.951467	53.9131	1.01585
Mgs	8	0.0504983	0.0447571	0.428573	0.179665	99.5209	0.209527	0.428832	0.17981
L	+	+		+		+
Bulk (8/93)		8		85.56		6.44		93
Measured	1	8.76024		83.7533		7.48641		91.7948
K2Ca3	9	25.4793	0.675527	66.9878	0.975768	7.53297	0.848706	89.8924	1.11738
Arg	7	0.638263	0.257338	99.3617	0.257338	0	0	100	0
Ca-Dol	6	0.54074	0.395711	55.7258	2.81316	43.5797	2.72565	56.1135	2.77477
Bulk (8/75)		8		69		23		75
Measured	1	9.44653		67.9395		22.614		75.0269
K2Ca3	12	24.9627	0.39573	67.5924	0.441766	7.44493	0.341297	90.0787	0.441609
Arg	7	0.852735	0.234831	99.0658	0.416534	0.0814868	0.215594	99.9175	0.21828
Ca-Dol	8	0.75044	0.293536	60.5606	0.646887	38.6889	0.656954	61.0187	0.641889
Bulk (8/40)		8		36.8		55.2		40
Measured	1	6.3679		45.7983		47.8338		48.9131
K2Ca3	10	25.1798	0.271181	65.7388	0.172225	9.08145	0.200646	87.8628	0.235063
Dol	9	0.691744	0.334149	51.2334	0.646981	48.0749	0.601325	51.59	0.605781
Mgs	10	0	0.0565523	0.668841	0.140585	99.3133	0.18461	0.669011	0.140961

## Sheet: Table S5 1200 oC
Bulk (K2#/Ca#)											Phase	K2CO3	CaCO3	MgCO3	Ca#
Phases	n	K2CO3	σ	CaCO3	σ	MgCO3	σ	Ca#	σ
											K2Ca3	25.1969	73.8356	0.967456	98.7068
Bulk (64/25)		64		9		27		25				25.3423	71.1708	4.97003	93.3048
Measured	1	58.2033		11.1011		30.6956		26.5598
L	4	57.9104		10.8437		31.2459		25.7808			Arg	0.138082	99.8619	0	100
Bulk (59/96)		59		39.36		1.64		96			Ca-Dol	0.095485	53.5982	46.3063	53.6497
Measured	1	51.6065		45.9149		2.47855		94.8783				0.0610677	67.3935	32.5454	67.4349
L	5	51.7272	0.314697	45.5516	0.229685	2.72118	0.15861	94.3639	0.303948
											Dol	0.109874	46.2142	53.676	46.2648
Bulk (49/90)		49		45.9		5.1		90
Measured	1	42.7281		49.7143		7.55755		86.8041			Mgs	0.107121	4.11312	95.7798	4.11785
L	3	42.8427		49.5296		7.62771		86.6536				0.0248966	6.25707	93.718	6.25862
												0.150212	10.4734	89.3764	10.4896
Bulk (45/35)		45		19.25		35.75		35
Measured	1	41.4511		23.0074		35.5415		39.2961			L	57.9104	10.8437	31.2459	25.7808
L	3	42.1586		22.5755		35.266		39.0297				51.7272	45.5516	2.72118	94.3639
												42.8427	49.5296	7.62771	86.6536
Bulk (39/96)		39		58.56		2.44		96				42.1586	22.5755	35.266	39.0297
Measured	1	35.5211		60.9724		3.50658		94.5617				35.9223	60.6358	3.44189	94.6293
K2Ca3	6	25.1969	0.0875513	73.8356	0.108058	0.967456	0.173159	98.7068	0.230345			27.1945	61.0804	11.7251	83.8956
L	5	35.9223	0.233082	60.6358	0.089367	3.44189	0.19323	94.6293	0.284329			29.4423	35.263	35.2947	49.9779
												22.5175	66.5717	10.9108	85.9191
Bulk (27/90)		27		65.7		7.3		90				28.0531	37.138	34.809	51.619
Measured	1	25.8904		66.1304		7.97923		89.2332				21.2594	50.3936	28.347	63.9988
K2Ca3	7	25.3423	0.774984	71.1708	0.261733	4.97003	3.17407	93.3048	4.40317			19.0599	56.6173	24.3227	69.95
L	4	27.1945		61.0804		11.7251		83.8956				19.5883	48.569	31.8427	60.3997
Bulk (25/25)		25		18.75		56.25		25
Measured	1	17.2751		21.5093		61.2156		26.001
Mgs	8	0.107121	0.202348	4.11312	0.612218	95.7798	0.695935	4.11785	0.615222
L	6	29.4423	0.127733	35.263	0.281713	35.2947	0.335236	49.9779	0.42948
Bulk (14/92)		14		79.1		6.9		92
Measured	1	13.7066		79.7017		6.59169		92.3613
Arg	6	0.138082	0.122903	99.8619	0.122903	0	0	100	0
L	3	22.5175		66.5717		10.9108		85.9191
Bulk (16/35)		16		29.4		54.6		35
Measured	1	17.9305		24.9025		57.167		30.3432
Mgs	7	0.0248966	0.0428712	6.25707	0.591139	93.718	0.59061	6.25862	0.591017
L	6	28.0531	0.207763	37.138	0.192575	34.809	0.296321	51.619	0.318208
Bulk (12/62)		12		54.56		33.44		62
Measured	1	12.8573		51.9789		35.1638		59.648
Ca-Dol	10	0.095485	0.143324	53.5982	0.341379	46.3063	0.41143	53.6497	0.374313
L	6	21.2594	0.627083	50.3936	0.538807	28.347	0.273124	63.9988	0.313211
Bulk (8/75)		8		69		23		75
Measured	1	3.52057		65.4		31.0794		67.7865
Ca-Dol	10	0.0610677	0.0666319	67.3935	0.520836	32.5454	0.552478	67.4349	0.541928
L	4	19.0599		56.6173		24.3227		69.95
Bulk (8/40)		8		36.8		55.2		40
Measured	1	8.55644		30.1712		61.2723		32.9944
Dol	6	0.109874	0.0568663	46.2142	0.618614	53.676	0.579992	46.2648	0.600734
Mgs	9	0.150212	0.248629	10.4734	0.770761	89.3764	0.872101	10.4896	0.779731
L	4	19.5883		48.569		31.8427		60.3997

## Sheet: Table S6 1200 oC
Bulk (K2#/Ca#)											Phase	K2CO3	CaCO3	MgCO3	Ca#
Phases	n	K2CO3	σ	CaCO3	σ	MgCO3	σ	Ca#	σ
											K2	99.2305	0.769476	0	100
Bulk (90/55)		90		5.5		4.5		55				99.2631	0.73686	0	100
Measured	1	93.4973		4.03605		2.46667		62.0671
K2	6	99.2305	0.137351	0.769476	0.137351	0	0	100	0		K2Ca3	25.2647	67.3069	7.42844	90.0604
L	1	68.85		18.0074		13.1425		57.8088				25.2449	68.8912	5.86395	92.1558
												25.088	68.3655	6.54654	91.2612
Bulk (80/50)		80		10		10		50
Measured	1	81.7776		9.51937		8.70305		52.2399			K2Mg	49.4981	1.70353	48.7983	3.37311
K2	4	99.2631		0.73686		0		100				49.3657	3.10582	47.5285	6.12952
L	6	67.8207	0.695868	16.525	0.266636	15.6543	0.461992	51.3591	0.471233
											Arg	0.482898	99.5171	0	100
Bulk (40/5)		40		3		57		5				0.411697	99.562	0.026353	99.9735
Measured	1	39.8695		3.70515		56.4254		6.16184
K2Mg	12	49.4981	0.270172	1.70353	0.112733	48.7983	0.27623	3.37311	0.221319		Ca-Dol	0.322254	80.2389	19.4388	80.4984
Mgs	9	0.154809	0.0290121	0.75067	0.619553	99.0945	0.613156	0.751795	0.620381			0.25766	70.1239	29.6185	70.3048
L	4	41.1475		17.7717		41.0808		30.1963				0.340265	90.6495	9.01021	90.959
Bulk (30/15)		30		10.5		59.5		15			Dol	1.18269	45.6925	53.1248	46.2383
Measured	1	31.3948		12.8176		55.7877		18.6831				1.04194	46.9578	52.0002	47.4527
K2Mg	7	49.3657	0.328524	3.10582	0.546684	47.5285	0.367128	6.12952	1.04346			0.371912	62.5526	37.0755	62.7862
Mgs	7	0.139196	0.051894	1.16987	0.970317	98.6909	0.953651	1.17135	0.971334
L	4	37.6515		26.1257		36.2228		41.9029			Mgs	0.435397	1.32254	98.2421	1.32855
												0.0368724	0.497537	99.4656	0.497735
Bulk (20/82)		20		65.6		14.4		82
Measured	1	18.9612		66.9534		14.0854		82.619			L	68.85	18.0074	13.1425	57.8088
K2Ca3	10	25.2647	0.0936218	67.3069	0.183351	7.42844	0.173341	90.0604	0.230285			67.8207	16.525	15.6543	51.3591
Ca-Dol	6	0.322254	0.0705403	80.2389	0.468771	19.4388	0.480155	80.4984	0.479046			41.1475	17.7717	41.0808	30.1963
L	3	22.4187		59.65		17.9313		76.8867				37.6515	26.1257	36.2228	41.9029
												22.4187	59.65	17.9313	76.8867
Bulk (18/93)		18		76.26		5.74		93				22.5098	61.7243	15.766	79.6543
Measured	1	17.7794		76.8186		5.40206		93.4298				22.9491	55.5756	21.4754	72.1284
K2Ca3	9	25.2449	0.0864918	68.8912	0.177717	5.86395	0.158253	92.1558	0.211653			32.5353	40.5284	26.9363	60.0716
Arg	9	0.482898	0.102807	99.5171	0.102807	0	0	100	0			22.4333	59.5389	18.0278	76.7584
L	5	22.5098	0.0724383	61.7243	0.0515273	15.766	0.020911	79.6543	0.00796604			36.4568	37.9089	25.6343	59.6607
												24.2735	51.6818	24.0447	68.2663
Bulk (16/70)		16		58.8		25.2		70
Measured	1	16.1084		60.4858		23.4058		72.1
Ca-Dol	7	0.25766	0.0843848	70.1239	0.5565	29.6185	0.504706	70.3048	0.520336
L	2	22.9491		55.5756		21.4754		72.1284
Bulk (10/25)		10		22.5		67.5		25
Measured	1	9.70973		23.4703		66.82		25.9942
Dol	2	1.18269		45.6925		53.1248		46.2383
Mgs	5	0.435397	0.121712	1.32254	0.331663	98.2421	0.426614	1.32855	0.334486
L	5	32.5353	2.05851	40.5284	1.47203	26.9363	1.04128	60.0716	1.03449
Bulk (8/93)		8		85.56		6.44		93
Measured	1	8.62177		87.537		3.8412		95.7964
K2Ca3	5	25.088	0.168916	68.3655	0.106397	6.54654	0.127626	91.2612	0.155734
Arg	16	0.411697	0.165526	99.562	0.19038	0.026353	0.105412	99.9735	0.105805
Ca-Dol	4	0.340265		90.6495		9.01021		90.959
L	1	22.4333		59.5389		18.0278		76.7584
Bulk (8/40)		8		36.8		55.2		40
Measured	1	7.3589		40.7345		51.9066		43.9703
Dol	14	1.04194	0.399271	46.9578	0.549654	52.0002	0.633053	47.4527	0.561362
Mgs	4	0.0368724		0.497537		99.4656		0.497735
L	2	36.4568		37.9089		25.6343		59.6607
Bulk (5/65)		5		61.75		33.25		65
Measured	1	4.24343		61.61		34.1466		64.3402
Dol	12	0.371912	0.219486	62.5526	0.42628	37.0755	0.438194	62.7862	0.422086
L	2	24.2735		51.6818		24.0447		68.2663

## Sheet: Table S7 1200 oC
Bulk (K2#/Ca#)											Phase	K2CO3	CaCO3	MgCO3	Ca#
Phases	n	K2CO3	σ	CaCO3	σ	MgCO3	σ	Ca#	σ
											K2	89.5178	9.98878	0.493393	95.52
Bulk (75/75)		75		18.75		6.25		75				97.2722	1.46582	1.26198	54.004
Measured	1	66.6848		24.5643		8.75081		73.7333
K2	6	89.5178	1.20034	9.98878	0.920818	0.493393	0.406566	95.52	3.54683		K2Ca3	25.566	69.4863	4.94769	93.3531
L	4	63.025		26.9423		10.0327		72.8506
											K2Mg	49.8072	3.88251	46.3102	7.73558
Bulk (64/25)		64		9		27		25
Measured	1	66.5962		9.09156		24.3122		27.2172			Dol	0.314017	62.411	37.275	62.6075
K2	7	97.2722	0.333557	1.46582	0.235318	1.26198	0.280809	54.004	7.47724
L	7	66.4683	1.05711	9.13178	0.350243	24.3999	0.773436	27.2319	0.515913		Mgs	0.00750206	6.56821	93.4243	6.56866
												0.0439988	3.60116	96.3548	3.60242
Bulk (60/25)		60		10		30		25
Measured	1	58.8386		10.9082		30.2531		26.5012			L	63.025	26.9423	10.0327	72.8506
L	2	57.9989		11.157		30.844		26.5637				66.4683	9.13178	24.3999	27.2319
												57.9989	11.157	30.844	26.5637
Bulk (59/96)		59		39.36		1.64		96				52.5976	44.6657	2.73671	94.2268
Measured	1	52.3842		44.64		2.97578		93.7504				55.9157	40.5938	3.49051	92.0752
L	4	52.5976		44.6657		2.73671		94.2268				52.4467	18.5582	28.9951	39.0277
												46.7623	47.4456	5.79218	89.1218
Bulk (56/92)		56		40.48		3.52		92				40.3189	54.6509	5.03022	91.5709
Measured	1	57.37		39.2541		3.3759		92.0809				33.3455	33.4436	33.2109	50.1738
L	10	55.9157	2.12199	40.5938	2.05055	3.49051	0.271907	92.0752	0.606617			36.5694	27.3958	36.0348	43.1838
												22.9499	53.2359	23.8141	69.0907
Bulk (50/25)		50		12.5		37.5		25
Measured	1	52.813		14.949		32.238		31.6803
K2Mg	5	49.8072	0.219927	3.88251	0.0772721	46.3102	0.265715	7.73558	0.17267
L	2	52.4467		18.5582		28.9951		39.0277
Bulk (49/90)		49		45.9		5.1		90
Measured	1	46.8789		47.4459		5.67522		89.3164
L	3	46.7623		47.4456		5.79218		89.1218
Bulk (42/92)		42		53.36		4.64		92
Measured	1	40.2057		54.911		4.88325		91.8332
L	2	40.3189		54.6509		5.03022		91.5709
Bulk (29/40)		29		28.4		42.6		40
Measured	1	28.2747		28.8177		42.9076		40.1778
Mgs	10	0.00750206	0.0237236	6.56821	0.901653	93.4243	0.897297	6.56866	0.901371
L	5	33.3455	0.940888	33.4436	0.530883	33.2109	0.456247	50.1738	0.230221
Bulk (27/90)		27		65.7		7.3		90
Measured	1	27.3759		65.1148		7.50923		89.6601
K2Ca3	7	25.566	0.0803823	69.4863	0.0814856	4.94769	0.136523	93.3531	0.177336
L	+	+		+		+
Bulk (25/25)		25		18.75		56.25		25
Measured	1	25.4414		19.2704		55.2882		25.846
Mgs	5	0.0439988	0.0404041	3.60116	1.7792	96.3548	1.75694	3.60242	1.77956
L	3	36.5694		27.3958		36.0348		43.1838
Bulk (5/65)		5		61.75		33.25		65
Measured	1	10.3497		58.5716		31.0788		65.3334
Dol	9	0.314017	0.118497	62.411	0.547884	37.275	0.537152	62.6075	0.539922
L	2	22.9499		53.2359		23.8141		69.0907

## Sheet: Table S8 1250 oC
Bulk (K2#/Ca#)											Phase	K2CO3	CaCO3	MgCO3	Ca#
Phases	n	K2CO3	σ	CaCO3	σ	MgCO3	σ	Ca#	σ
											K2	95.8286	3.27074	0.904025	79.9169
Bulk (90/55)		90		5.5		4.5		55				95.9863	3.14319	0.87052	78.3792
Measured	1	88.3588		7.29223		4.34897		62.6416
K2	14	95.8286	1.32443	3.27074	1.22784	0.904025	0.205239	79.9169	4.21843		K2Ca3	25.4073	71.2755	3.31718	95.5532
L	5	68.9501	1.13112	13.8129	0.363998	17.237	0.858707	44.5078	0.952482
											K2Mg	49.6564	0.630968	49.7126	1.25265
Bulk (80/50)		80		10		10		50
Measured	1	76.0634		11.5349		12.4018		48.1892			Mg-Cal	0.567593	95.3239	4.10853	95.8675
K2	13	95.9863	0.319683	3.14319	0.247722	0.87052	0.164807	78.3792	3.41285			0.255104	95.2229	4.52196	95.4665
L	4	69.4092		13.7719		16.8189		45.0274
											Dol	0.216447	92.1195	7.66408	92.3193
Bulk (75/75)		75		18.75		6.25		75				0.428756	91.2881	8.28318	91.6808
Measured	1	76.0043		18.02		5.9757		75.0968				0.566503	77.4684	21.9651	77.9101
K2	+	+		+		+						0.836314	45.8516	53.312	46.2387
L	10	64.6923	1.48704	25.2049	1.1735	10.1029	0.50165	71.3809	0.960663			0.237988	64.5674	35.271	64.672
Bulk (75/25)		75		6.25		18.75		25			Mgs	0.0994673	0.472217	99.4283	0.472692
Measured	1	67.5503		10.07		22.3796		31.0328				0.0341226	1.88049	98.0854	1.88113
L	4	70.1697		9.2792		20.5511		31.1492				0.152886	3.30467	96.5424	3.30883
												0.121056	5.21837	94.6606	5.22906
Bulk (40/5)		40		3		57		5				0.0518673	0.608752	99.3394	0.609057
Measured	1	43.3505		4.66665		51.9828		8.23776				0.0733163	0.520368	99.4063	0.520753
K2Mg	15	49.6564	0.405012	0.630968	0.138168	49.7126	0.3776	1.25265	0.270674
Mgs	9	0.0994673	0.0361956	0.472217	0.0550372	99.4283	0.0726271	0.472692	0.0551269		L	68.9501	13.8129	17.237	44.5078
L	13	45.2252	0.580344	5.60739	0.612277	49.1674	0.484355	10.2308	1.05709			69.4092	13.7719	16.8189	45.0274
												64.6923	25.2049	10.1029	71.3809
Bulk (30/15)		30		10.5		59.5		15				70.1697	9.2792	20.5511	31.1492
Measured	1	33.481		11.1586		55.3604		16.7751				45.2252	5.60739	49.1674	10.2308
Mgs	5	0.0341226	0.0472631	1.88049	0.0695321	98.0854	0.0942279	1.88113	0.0697855			40.8958	14.126	44.9782	23.9001
L	1	40.8958		14.126		44.9782		23.9001				34.6841	26.7007	38.6152	40.8793
												20.542	64.343	15.1151	80.9774
Bulk (25/25)		25		18.75		56.25		25				20.9659	63.8719	15.1622	80.8152
Measured	1	26.9797		20.8077		52.2126		28.4958				21.652	69.1112	9.23676	88.2106
Mgs	5	0.152886	0.224323	3.30467	1.18235	96.5424	1.10451	3.30883	1.18062			25.5018	41.9598	32.5384	56.3229
L	2	34.6841		26.7007		38.6152		40.8793				23.08	41.11	35.81	53.44
												21.6716	68.0674	10.261	86.8996
Bulk (20/82)		20		65.6		14.4		82				18.2128	59.7629	22.0244	73.0713
Measured	1	18.8949		66.5291		14.576		82.0283				18	36.8	55.2	59
Dol	4	0.216447		92.1195		7.66408		92.3193				18.6037	55.867	25.5293	68.6344
L	8	20.542	0.13792	64.343	0.238864	15.1151	0.248996	80.9774	0.303689
Bulk (20/82)		20		65.6		14.4		82
Measured	1	19.344		65.9535		14.7025		81.7713
Dol	7	0.428756	0.273944	91.2881	0.533392	8.28318	0.38304	91.6808	0.392482
L	5	20.9659	0.160109	63.8719	0.387353	15.1622	0.24903	80.8152	0.346059
Bulk (18/92)		18		75.44		6.56		92
Measured	1	18.1965		75.8543		5.94917		92.7275
K2Ca3	8	25.4073	0.182015	71.2755	0.164623	3.31718	0.164645	95.5532	0.21489
Mg-Cal	13	0.567593	0.430135	95.3239	0.560074	4.10853	0.197548	95.8675	0.209185
L	4	21.652		69.1112		9.23676		88.2106
Bulk (16/35)		16		29.4		54.6		35
Measured	1	18.278		30.7023		51.0197		37.5692
Mgs	14	0.121056	0.126806	5.21837	5.11362	94.6606	5.20603	5.22906	5.12634
L	3	25.5018		41.9598		32.5384		56.3229
Bulk (10/25)		10		22.5		67.5		25
Measured	1	9.35343		21.1244		69.5222		23.3041
Mgs	13	0.0518673	0.0411382	0.608752	0.10364	99.3394	0.100147	0.609057	0.103642
L	1	23.08		41.11		35.81		53.44
Bulk (8/93)		8		85.56		6.44		93
Measured	1	6.60581		87.1584		6.23574		93.3232
Mg-Cal	12	0.255104	0.0779043	95.2229	0.134143	4.52196	0.125862	95.4665	0.125538
L	5	21.6716	0.469681	68.0674	0.487147	10.261	0.0746694	86.8996	0.132345
Bulk (8/75)		8		69		23		75
Measured	1	8.01367		70.0126		21.9737		76.112
Dol	5	0.566503	0.443636	77.4684	0.724003	21.9651	0.705831	77.9101	0.688757
L	3	18.2128		59.7629		22.0244		73.0713
Bulk (8/40)		8		36.8		55.2		40
Measured	2	6.76381		42.4952		50.741		45.578
Dol	24	0.836314	0.633892	45.8516	0.467405	53.312	0.576577	46.2387	0.418397
Mgs	13	0.0733163	0.0410627	0.520368	0.0520875	99.4063	0.0725279	0.520753	0.0521777
L	3	18		36.8		55.2		59
Bulk (5/65)		5		61.75		33.25		65
Measured	2	4.47296		62.7734		32.7536		65.7128
Dol	17	0.237988	0.113207	64.5674	0.321456	35.271	0.311925	64.672	0.311394
L	4	18.6037		55.867		25.5293		68.6344

## Sheet: Table S9 1300 oC
Bulk (K2#/Ca#)											Phase	K2CO3	CaCO3	MgCO3	Ca#
Phases	n	K2CO3	σ	CaCO3	σ	MgCO3	σ	Ca#	σ
											K2	96.4079	2.99489	0.597204	84.539
Bulk (90/55)		90		5.5		4.5		55				86.522	12.6243	0.853743	93.7771
Measured	1	85.8619		7.56963		6.56849		53.5406
K2	12	96.4079	0.666291	2.99489	0.374549	0.597204	0.460963	84.539	9.46134		Mg-Cal	0.283981	95.9713	3.74476	96.2446
L	14	79.2557	1.7938	10.7358	1.07258	10.0085	1.00788	51.7657	2.57198			0.272151	95.264	4.46387	95.524
Bulk (75/75)		75		18.75		6.25		75			Dol	0.225009	56.4236	43.3514	56.551
Measured	1	67.4337		24.6774		7.88894		75.7757				0.309655	84.0234	15.6669	84.2841
K2	2	86.522		12.6243		0.853743		93.7771				0.529258	44.1582	55.3125	44.3931
L	+											0.391949	63.6586	35.9494	63.9091
Bulk (64/50)		64		17		19		50			Mgs	0.016185	0.388833	99.595	0.388902
Measured	1	63.5724		17.4309		18.9967		47.8507				0	1.72632	98.2737	1.72632
L	3	67.2167		15.653		17.1303		47.7585				0.0998332	3.10827	96.7919	3.11145
												0.107259	9.78699	90.1057	9.79723
Bulk (40/5)		40		3		57		5				0.509265	9.21753	90.2732	9.26618
Measured	1	40.214		4.1231		55.6629		6.89644
Mgs	9	0.016185	0.0322118	0.388833	0.0586254	99.595	0.075617	0.388902	0.0586712		L	79.2557	10.7358	10.0085	51.7657
L	5	43.3978	0.316063	4.20606	0.152195	52.3962	0.280411	7.43053	0.252827			67.2167	15.653	17.1303	47.7585
												43.3978	4.20606	52.3962	7.43053
Bulk (30/15)		30		10.5		59.5		15				37.8834	12.8768	49.2398	20.7298
Measured	1	30.9386		10.5293		58.5322		15.2462				33.2221	25.1224	41.6554	37.6204
Mgs	9	0	0	1.72632	0.133893	98.2737	0.133893	1.72632	0.133893			19.1255	66.0778	14.7967	81.7039
L	5	37.8834	0.433187	12.8768	0.512393	49.2398	0.59005	20.7298	0.802647			18.685	72.5975	8.71749	89.2786
												24.0821	41.5814	34.3365	54.774
Bulk (25/25)		25		18.75		56.25		25				15.8229	55.7856	28.3915	66.2725
Measured	1	25.6583		19.3662		54.9755		26.0502				18.2762	43.479	38.2448	53.1914
Mgs	10	0.0998332	0.0478256	3.10827	0.757431	96.7919	0.7699	3.11145	0.758531			20.2465	68.9936	10.7599	86.5058
L	5	33.2221	0.583768	25.1224	0.408022	41.6554	0.443904	37.6204	0.465561			14.9457	61.6723	23.382	72.5086
												15.2725	50.004	34.7236	59.0307
Bulk (20/82)		20		65.6		14.4		82				15.8539	57.0845	27.0615	67.8341
Measured	1	19.2916		65.9563		14.7521		81.7217
L	5	19.1255	0.197749	66.0778	0.387653	14.7967	0.286736	81.7039	0.368717
Bulk (18/92)		18		75.44		6.56		92
Measured	1	15.5565		76.7811		7.66236		90.9261
Mg-Cal	7	0.283981	0.076031	95.9713	0.154307	3.74476	0.112848	96.2446	0.114081
L	6	18.685	0.251264	72.5975	0.497454	8.71749	0.269639	89.2786	0.358768
Bulk (16/35)		16		29.4		54.6		35
Measured	1	15.8345		29.4132		54.7523		34.9469
Mgs	9	0.107259	0.0621242	9.78699	0.767674	90.1057	0.728758	9.79723	0.765091
L	3	24.0821		41.5814		34.3365		54.774
Bulk (12/62)		12		54.56		33.44		62
Measured	1	11.5264		55.9811		32.4925		63.2744
Dol	13	0.225009	0.154785	56.4236	0.500322	43.3514	0.519551	56.551	0.506502
L	6	15.8229	0.763757	55.7856	0.444893	28.3915	0.367883	66.2725	0.191402
Bulk (10/25)		10		22.5		67.5		25
Measured	1	10.9031		21.0425		68.0544		23.6175
Mgs	12	0.509265	0.263948	9.21753	0.871634	90.2732	1.09624	9.26618	0.896633
L	4	18.2762		43.479		38.2448		53.1914
Bulk (8/93)		8		85.56		6.44		93
Measured	1	4.23531		90.1451		5.61958		94.1319
Mg-Cal	11	0.272151	0.101822	95.264	0.131637	4.46387	0.115543	95.524	0.114666
L	2	20.2465		68.9936		10.7599		86.5058
Bulk (8/75)		8		69		23		75
Measured	1	8.04044		70.5502		21.4094		76.7187
Dol	11	0.309655	0.131534	84.0234	0.568573	15.6669	0.484112	84.2841	0.498838
L	5	14.9457	0.350209	61.6723	0.488213	23.382	0.219597	72.5086	0.324401
Bulk (8/40)		8		36.8		55.2		40
Measured	2	7.01321		38.7327		54.2541		41.6538
Dol	26	0.529258	0.355358	44.1582	0.570091	55.3125	0.564587	44.3931	0.543087
Mgs	11	0.0815967	0.0659085	0.752498	0.125857	99.1659	0.181825	0.753171	0.126407
L	8	15.2725	1.65698	50.004	3.72549	34.7236	3.92674	59.0307	4.4103
Bulk (5/65)		5		61.75		33.25		65
Measured	2	4.7884		62.6113		32.6003		65.7601
Dol	3	0.391949		63.6586		35.9494		63.9091
L	8	15.8539	2.53127	57.0845	1.95328	27.0615	0.579752	67.8341	0.287443

## Sheet: Table S10 Eutectic reactions
Phase		CaCO3	MgCO3	K2CO3		K2Mg	K8Ca3	K2Ca3	MFP	CaCO3	MgCO3	K2CO3
K2(Ca0.9Mg0.1)3(CO3)4	K2Ca3	2.7	0.3	1	MFP	24.7059	1.17647	10.5882	10.5882	28.5882	3.17647	10.5882		40
K8Ca3(CO3)7	K8Ca3	3	0	4		0	0	0	1.17647	3.52941	0	4.70588
K2(Mg0.6Ca0.4)(CO3)2	K2Mg	0.4	0.6	1					24.7059	9.88235	14.8235	24.7059
40K2CO3∙60(Ca0.70Mg0.30)CO3	LE1	42	18	40						42	18	40
										0	0	0
Phase		CaCO3	MgCO3	K2CO3		K2Mg	K8Ca3	K2	MFP	CaCO3	MgCO3	K2CO3
K2CO3	K2	0	0	1	MFP	17.1	6.96667	17.0333	17.0333	0	0	17.0333		62
K8Ca3(CO3)7	K8Ca3	3	0	4		0	0	0	6.96667	20.9	0	27.8667
K2(Mg0.6Ca0.4)(CO3)2	K2Mg	0.4	0.6	1					17.1	6.84	10.26	17.1
62K2CO3∙38(Ca0.73Mg0.27)CO3	LE2	27.74	10.26	62						27.74	10.26	62
										0	0	0
